# Supplementary material
Source: Springer Nature journal article supplement (https://www.springermedizin.de/resource/supplementary/13014_2008_114_MOESM5_ESM.pdf/9632938)

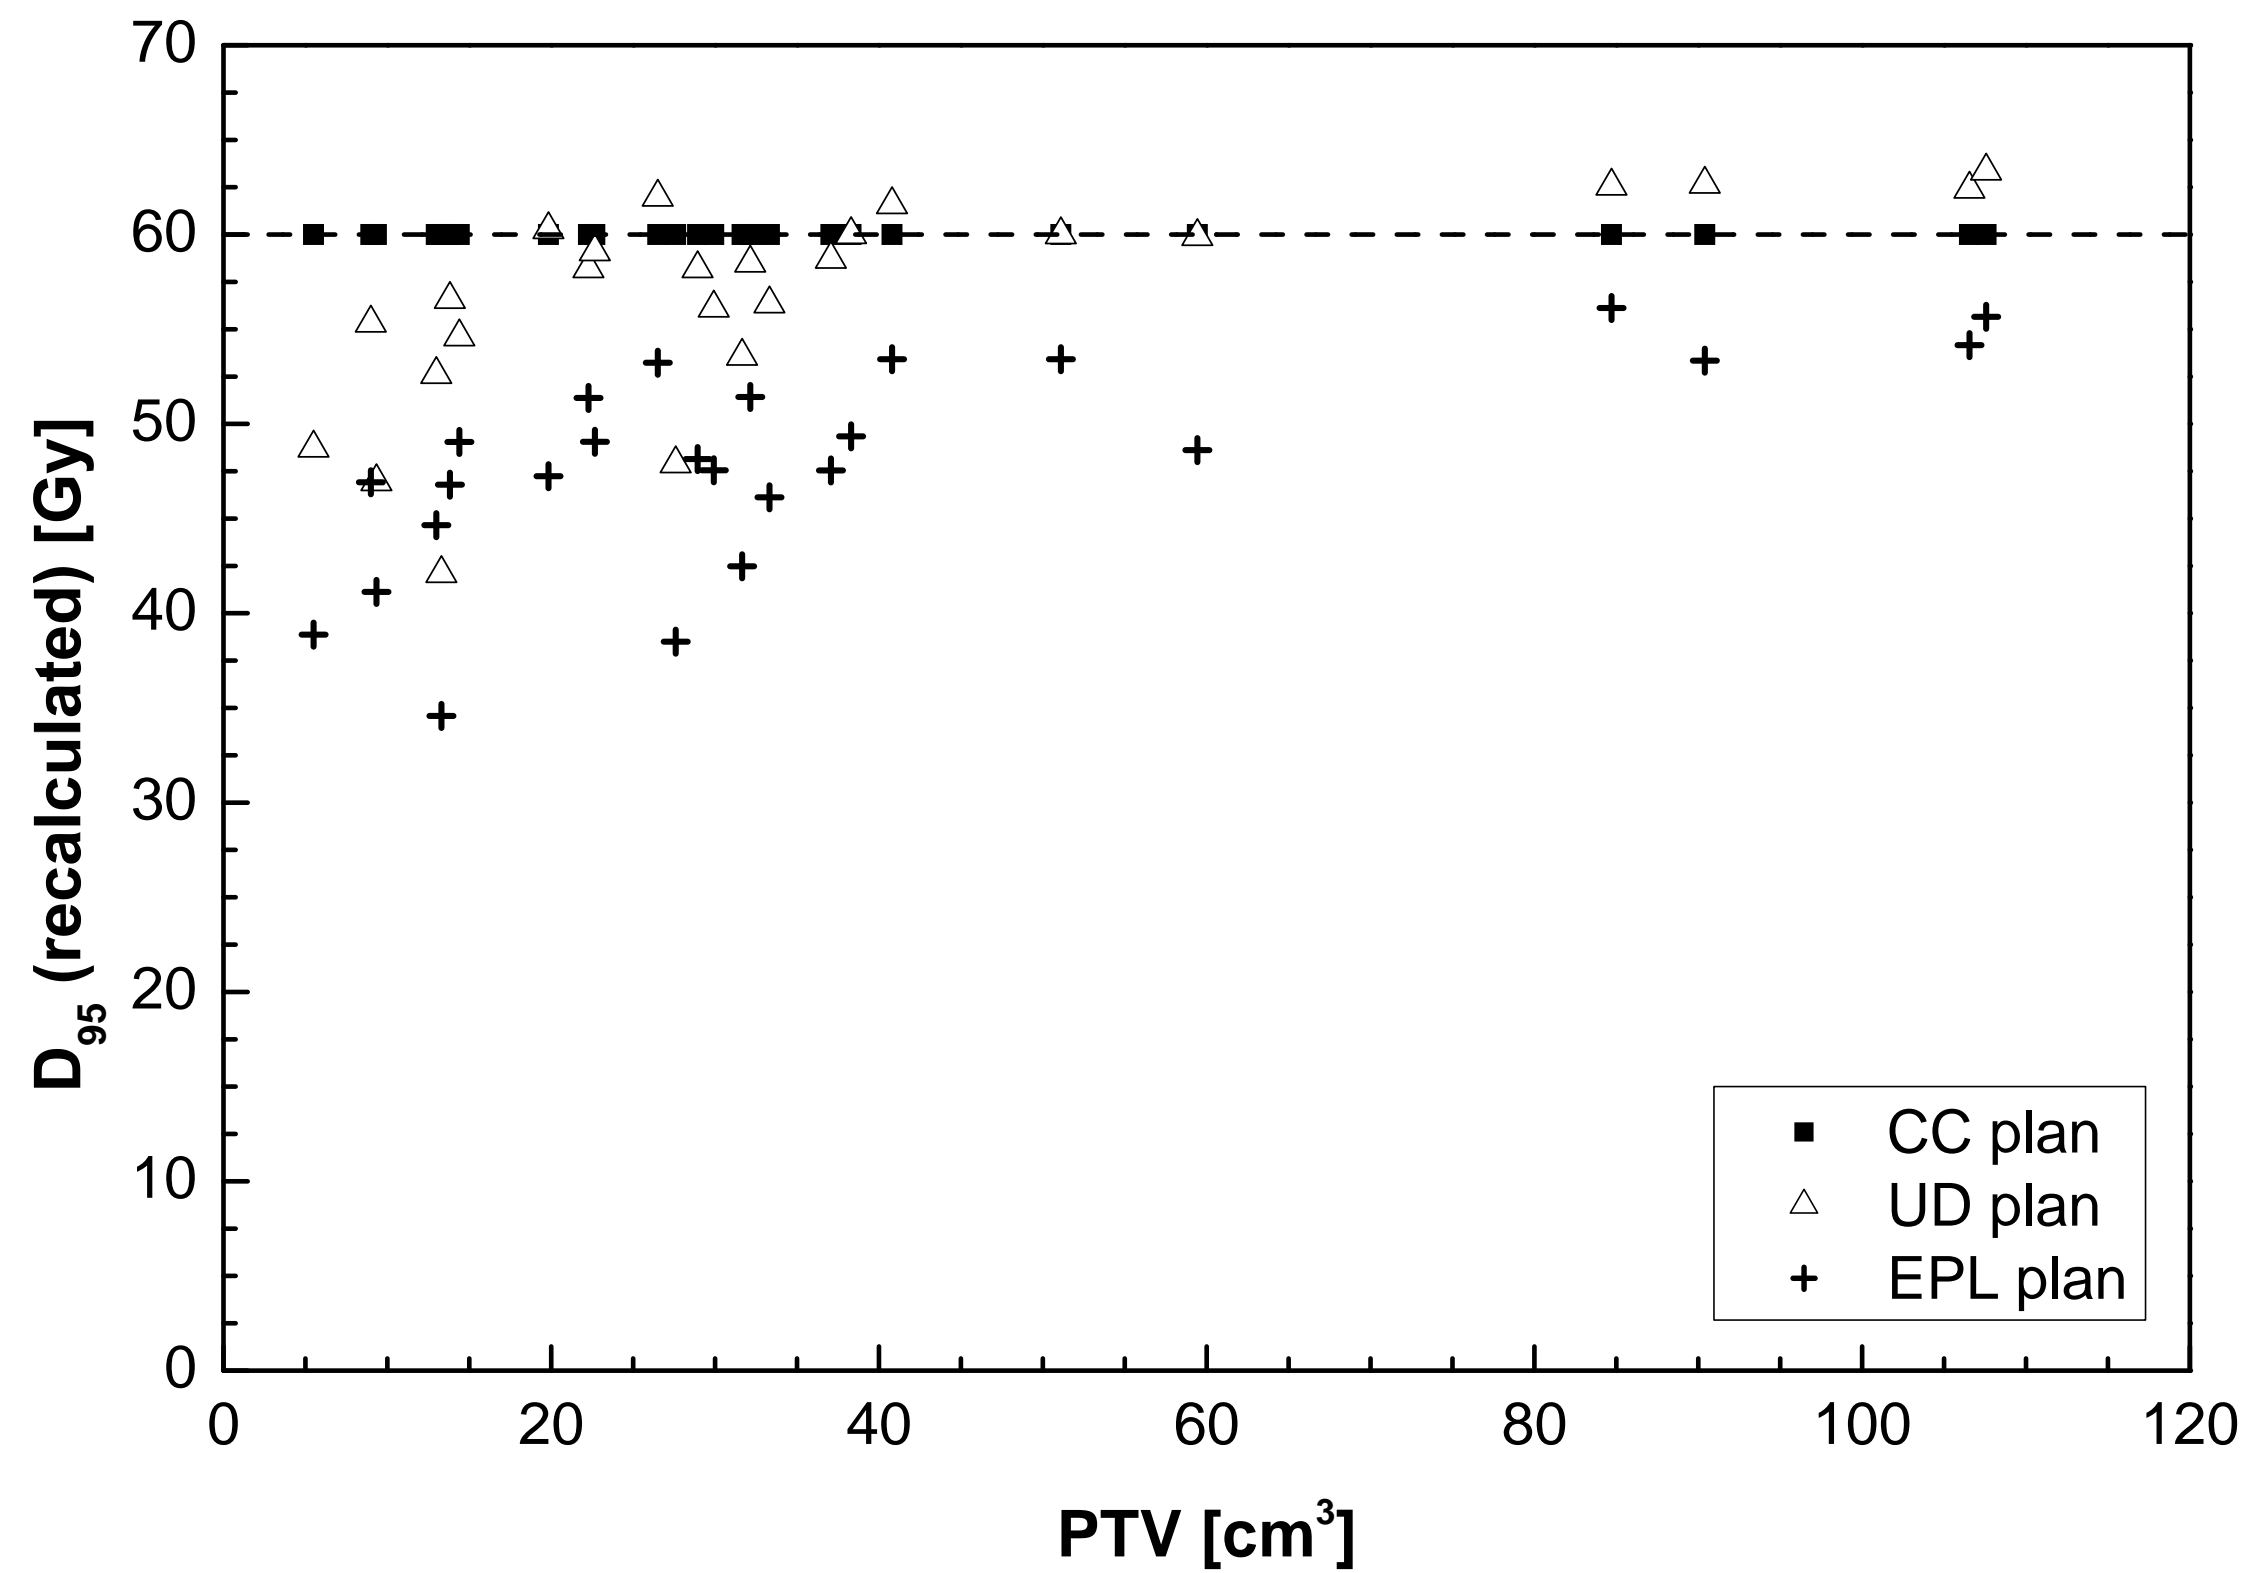

Supplement: MOESM5 [file 9632938]
